# Supplementary material for: Spectral- and size-resolved mass absorption efficiency of mineral dust aerosols in the shortwave: a simulation chamber study
Source: Copernicus journal article supplement (doi:10.5194/acp-2017-5), 2017-01-25
Supplement: Supplementary file 1 [file acp-2017-5-supplement.pdf]

1 **Figure S1.** Linear deconvolutions of the XANES spectra obtained in this study

2  
3

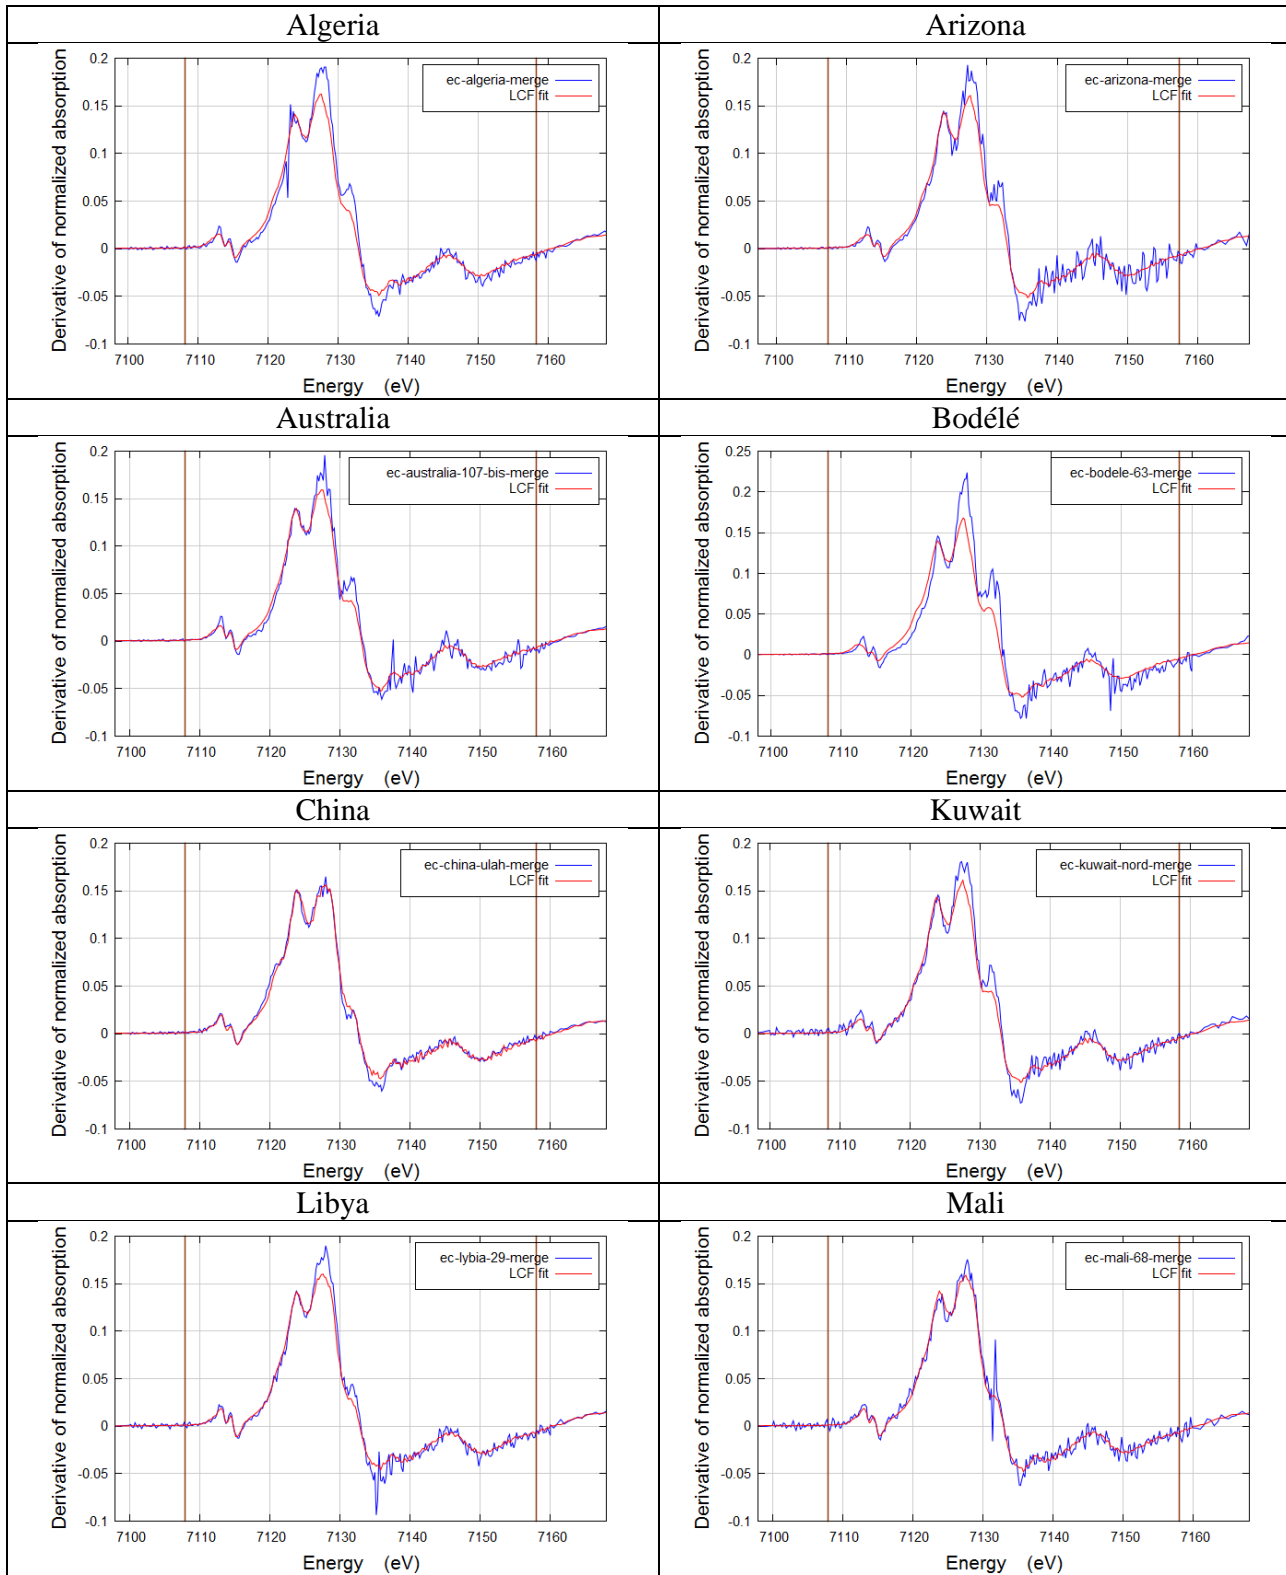

Morocco

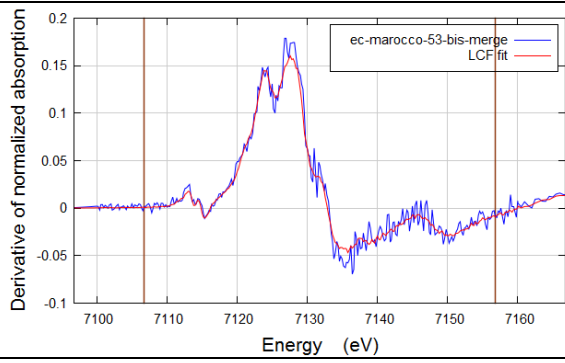

Namibia

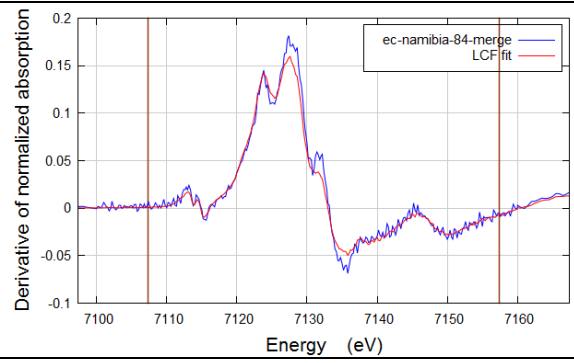

Patagonia

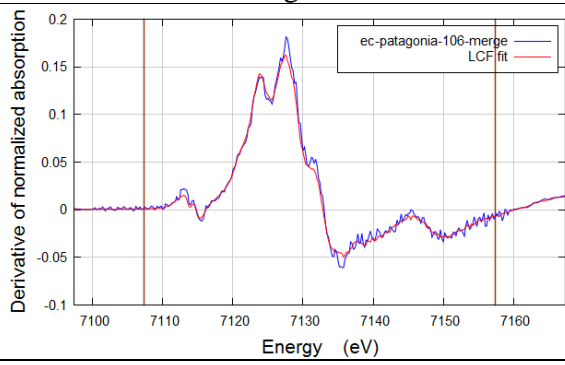

Saudi Arabia

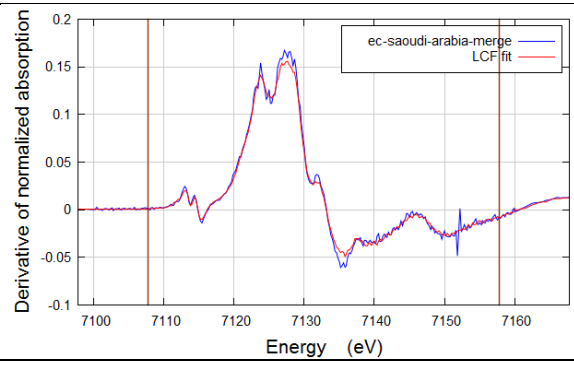

4  
5
